# Supplementary material for: Identification of novel human microcephaly-linked protein Mtss2 that mediates cortical progenitor cell division and corticogenesis through Nedd9-RhoA
Source: eLife journal article supplement (doi:10.7554/elife.92748), 2024-04-09
Supplement: fig4-data1 [file elife-92748-fig4-data1-v1.pdf]

### WB: anti-Nedd9

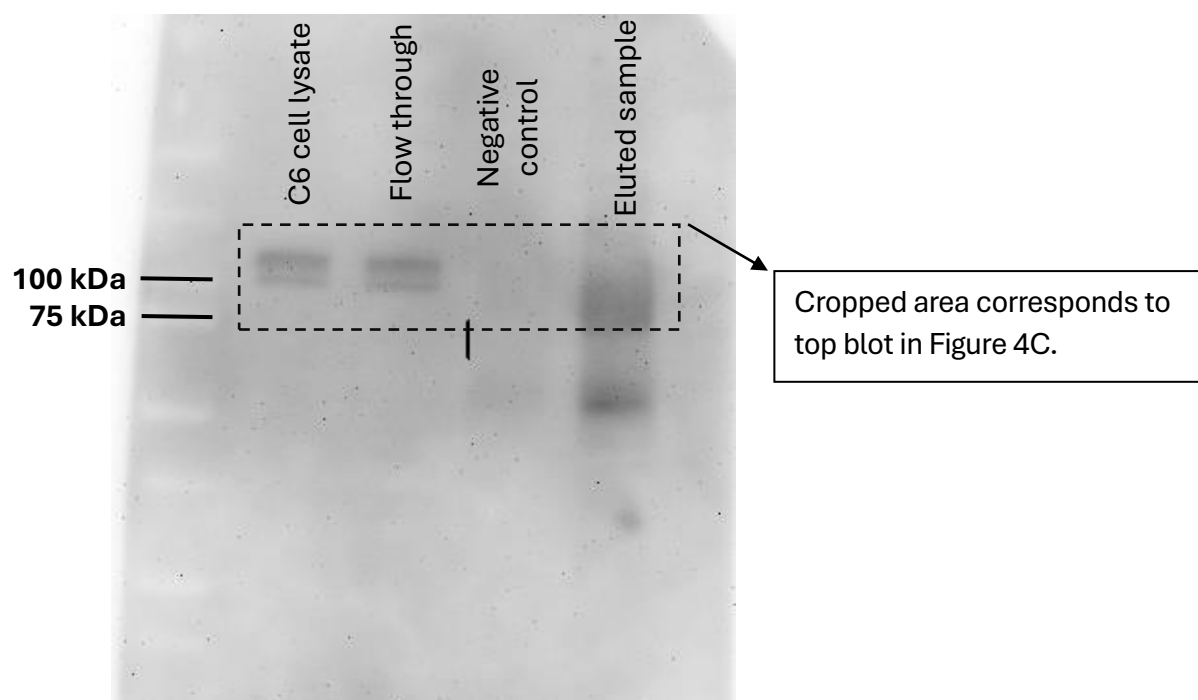

### WB: anti-Abba

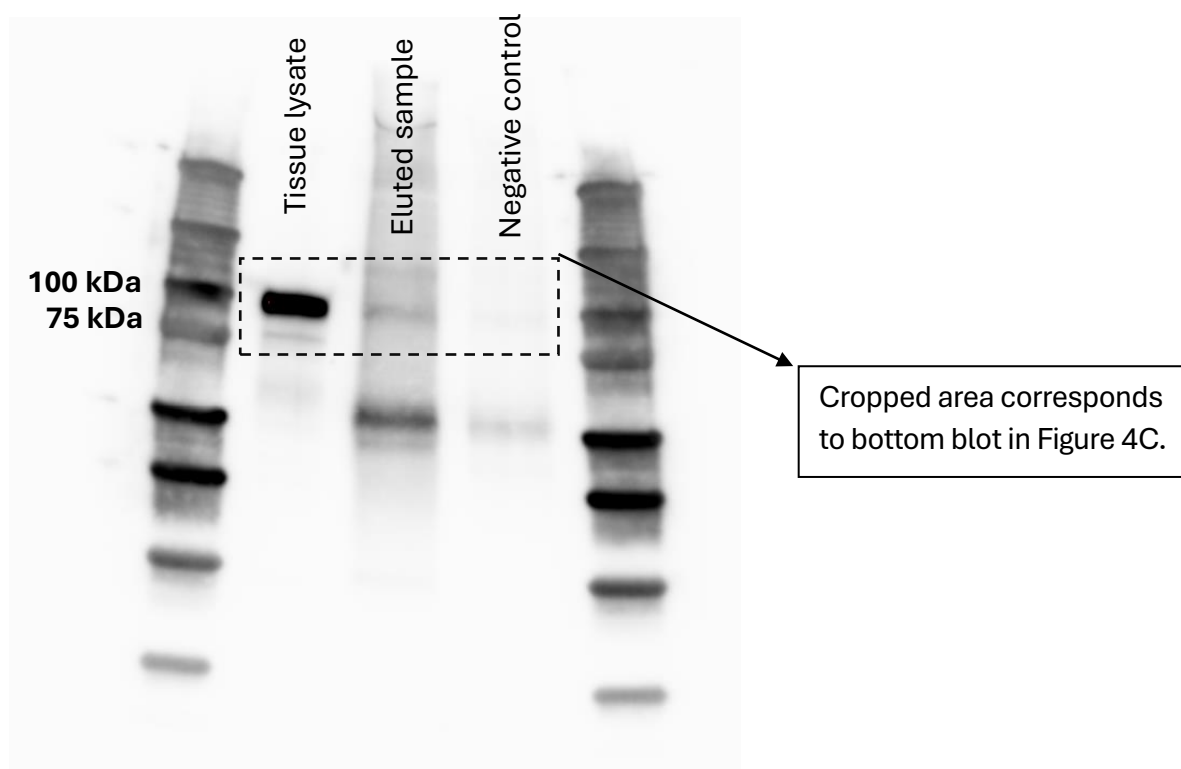

WB: anti-Abba

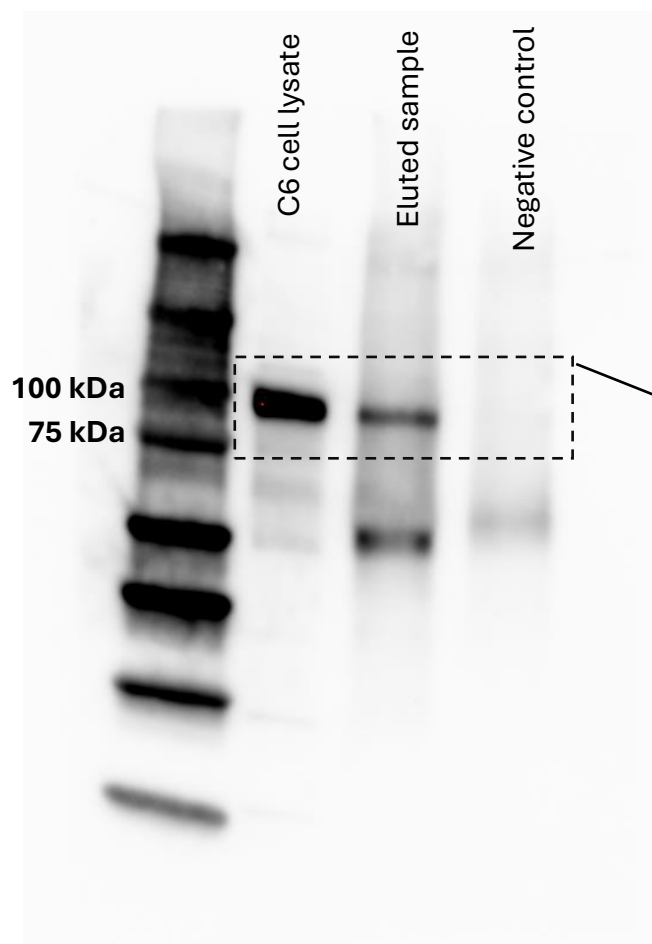

Cropped area corresponds to blot shown in Supplementary Figure 4D.
